# Supplementary figures and images for: Protein citrullination as a source of cancer neoantigens
Source: PubMed Central journal article supplement — J Immunother Cancer. 2021 Jun 6;9(6):e002549. doi: 10.1136/jitc-2021-002549 (PMC8194337; doi:10.1136/jitc-2021-002549), 2021-06-06

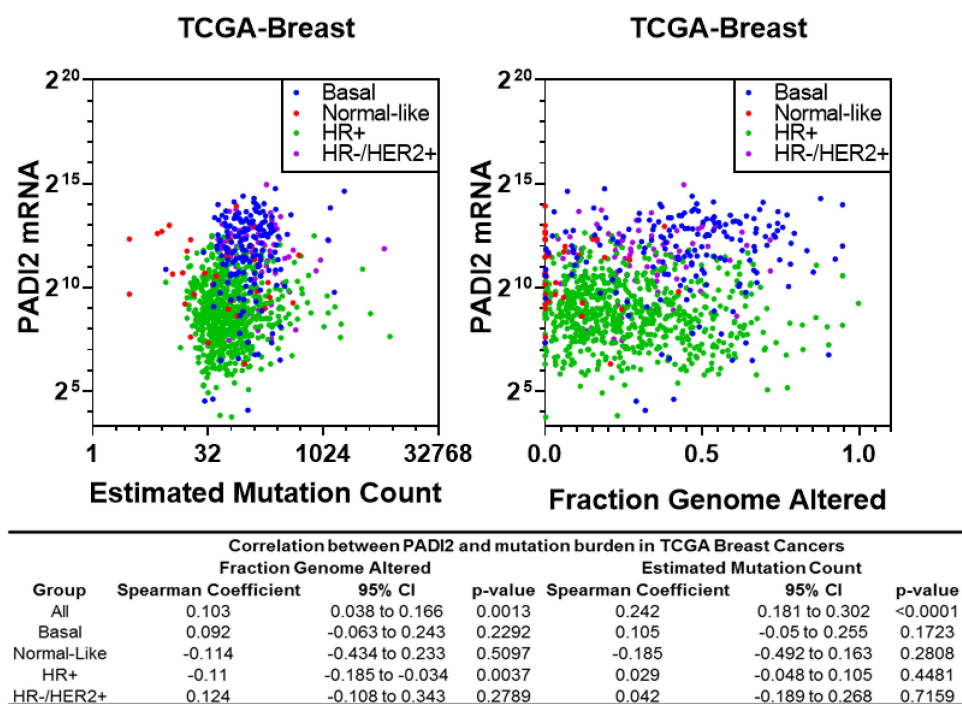

Fig. S1

Supplement: jitc-2021-002549supp002.pdf [file jitc-2021-002549supp002.pdf]

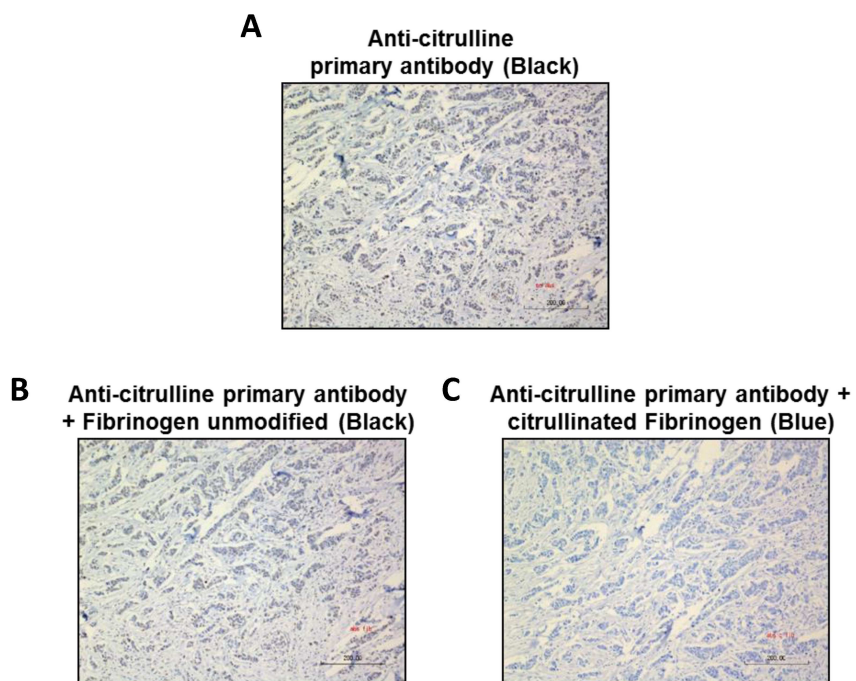**Fig. S2**

Supplement: jitc-2021-002549supp003.pdf [file jitc-2021-002549supp003.pdf]

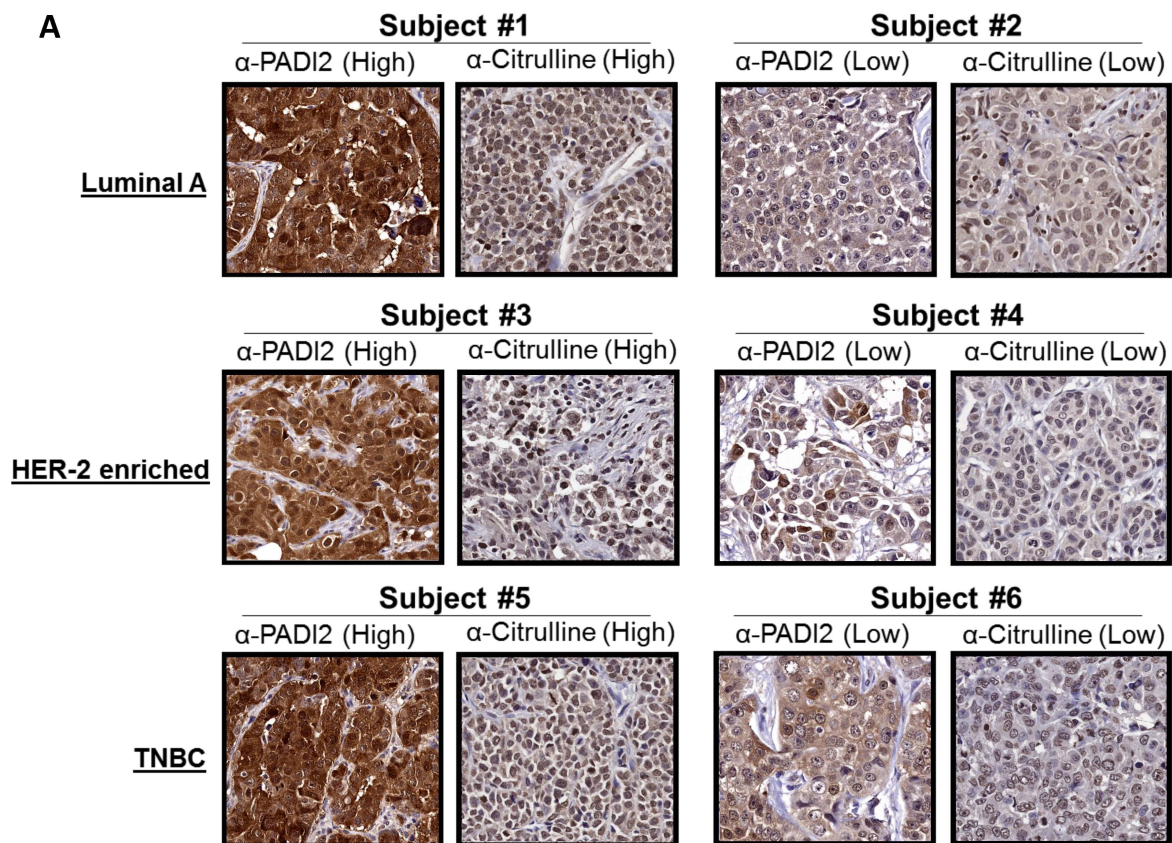

Fig. S3

Supplement: jitc-2021-002549supp004.pdf [file jitc-2021-002549supp004.pdf]

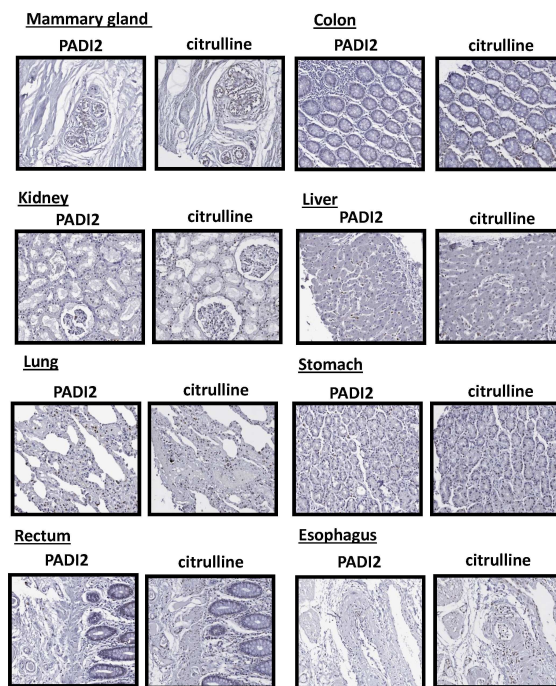**Fig. S4**

Supplement: jitc-2021-002549supp005.pdf [file jitc-2021-002549supp005.pdf]

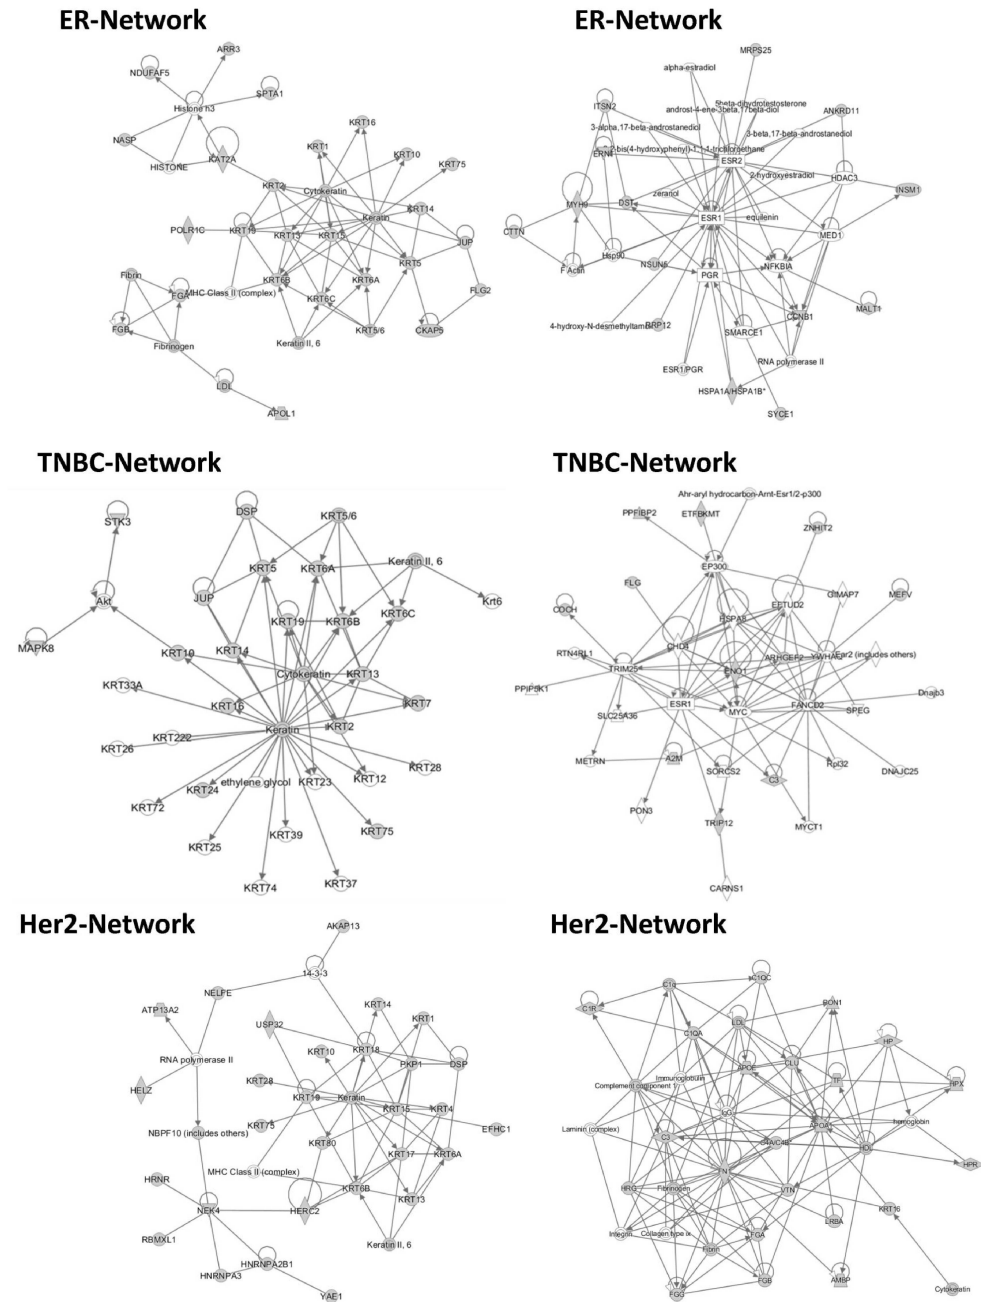

Fig. S5

Supplement: jitc-2021-002549supp006.pdf [file jitc-2021-002549supp006.pdf]

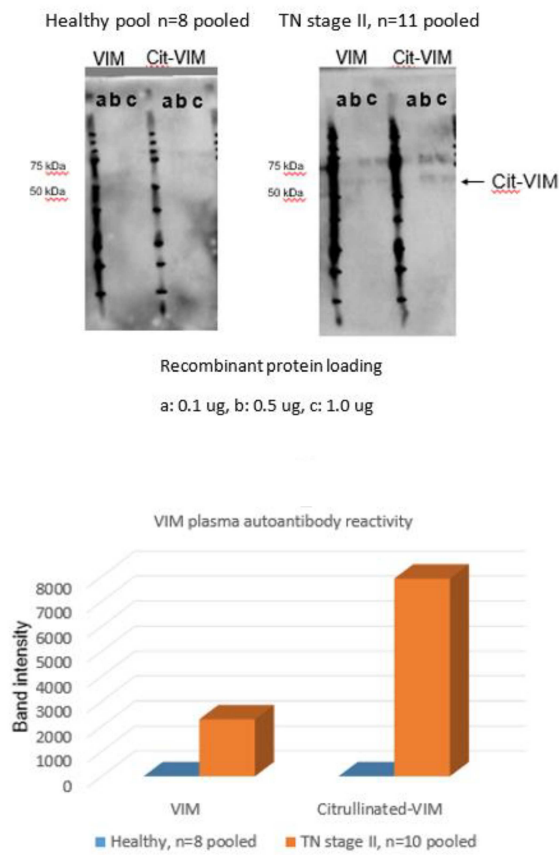**Fig. S6**

Supplement: jitc-2021-002549supp007.pdf [file jitc-2021-002549supp007.pdf]
